# Supplementary material for: Pharmacological inhibition of MALT1 (mucosa-associated lymphoid tissue lymphoma translocation protein 1) induces ferroptosis in vascular smooth muscle cells
Source: PubMed Central journal article supplement (PMC10721807; doi:10.1038/s41420-023-01748-9), 2023-12-15
Supplement: 41420_2023_1748_MOESM1_ESM.pdf [file 41420_2023_1748_MOESM1_ESM.pdf]

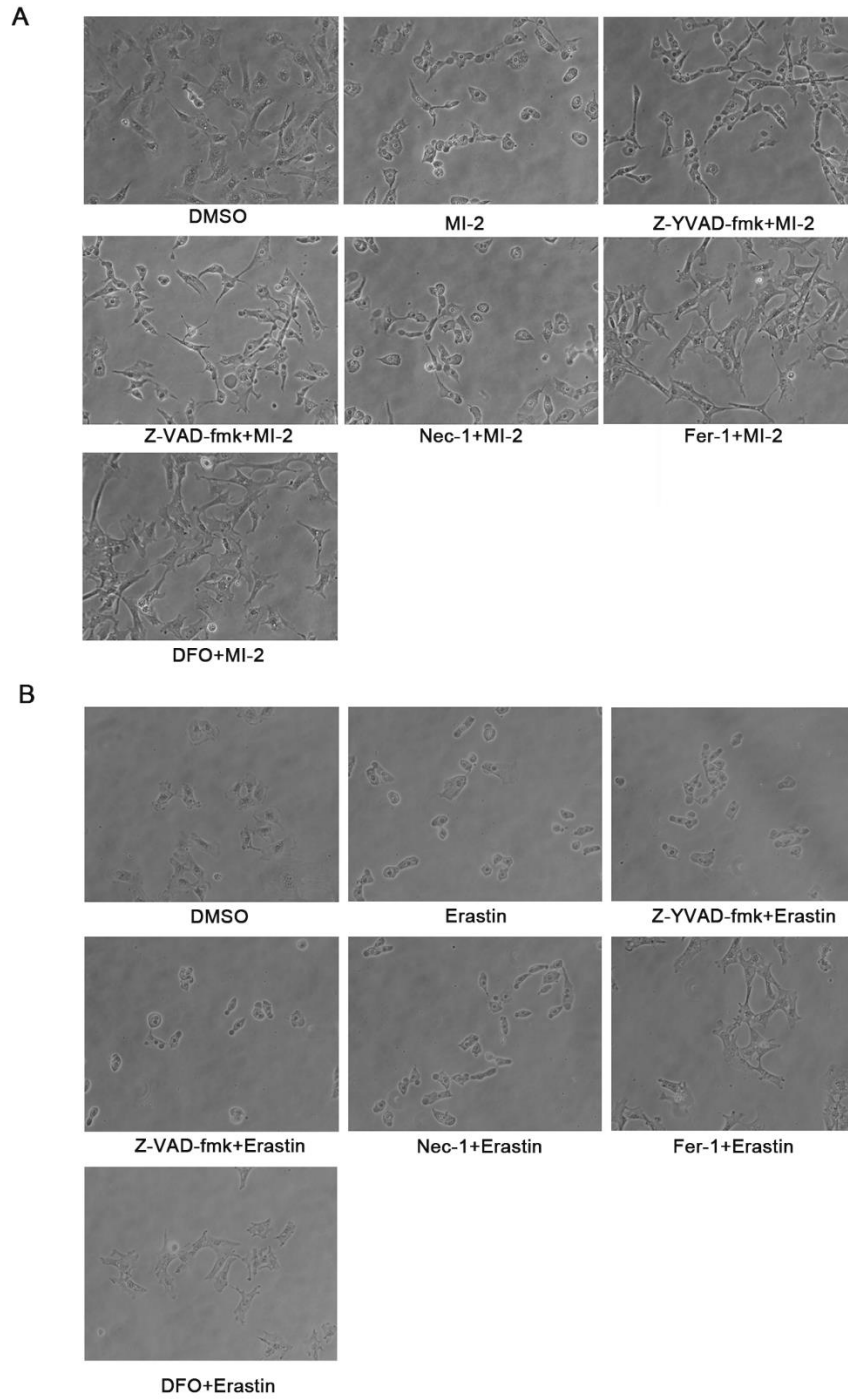

**Supplementary Fig. 1**

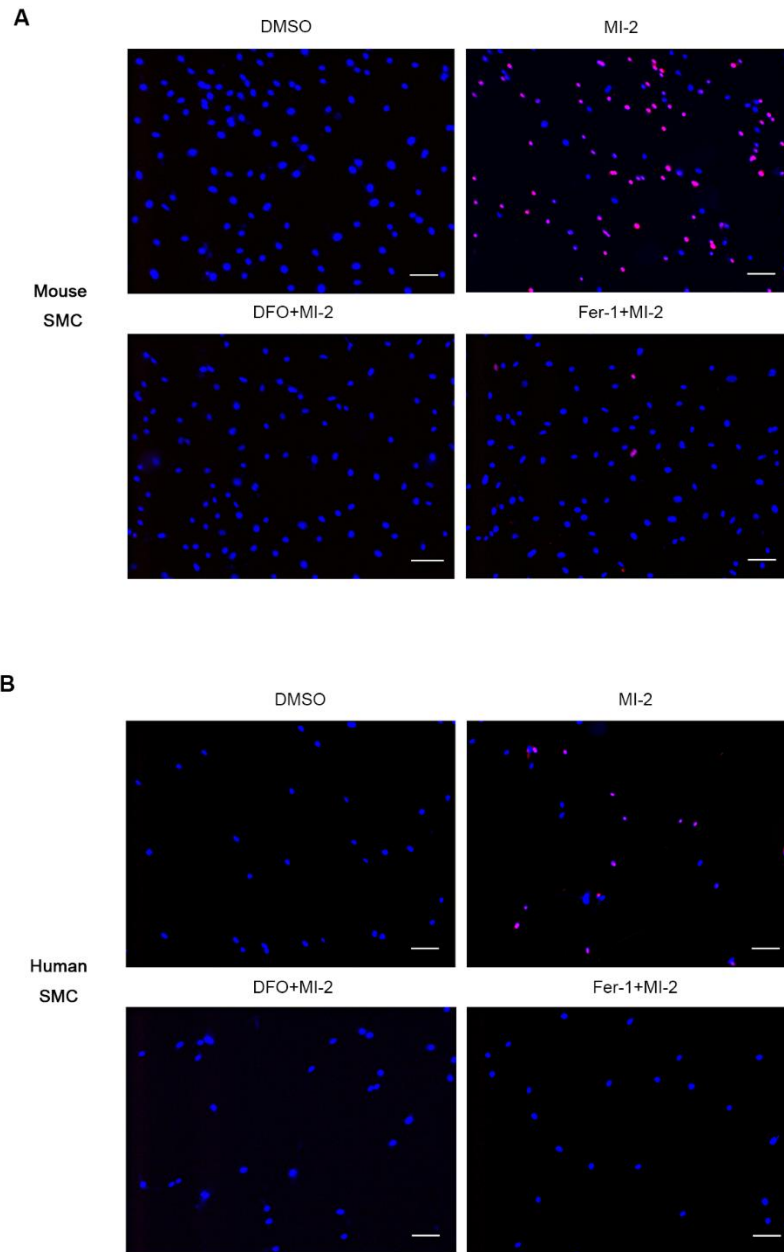

Supplementary Fig. 2

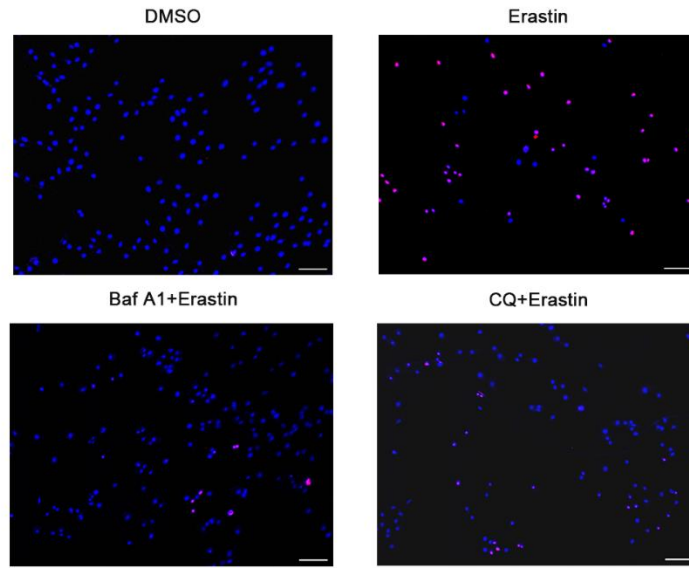

**Supplementary Fig. 3**

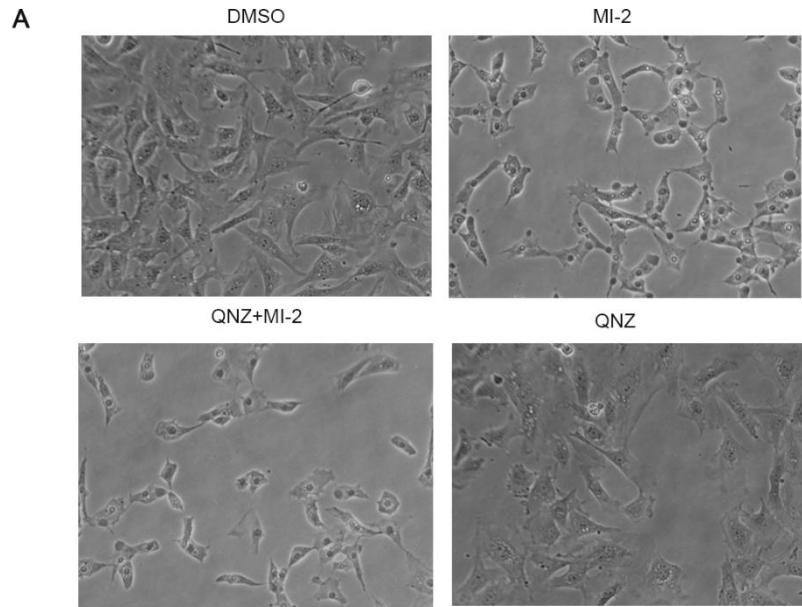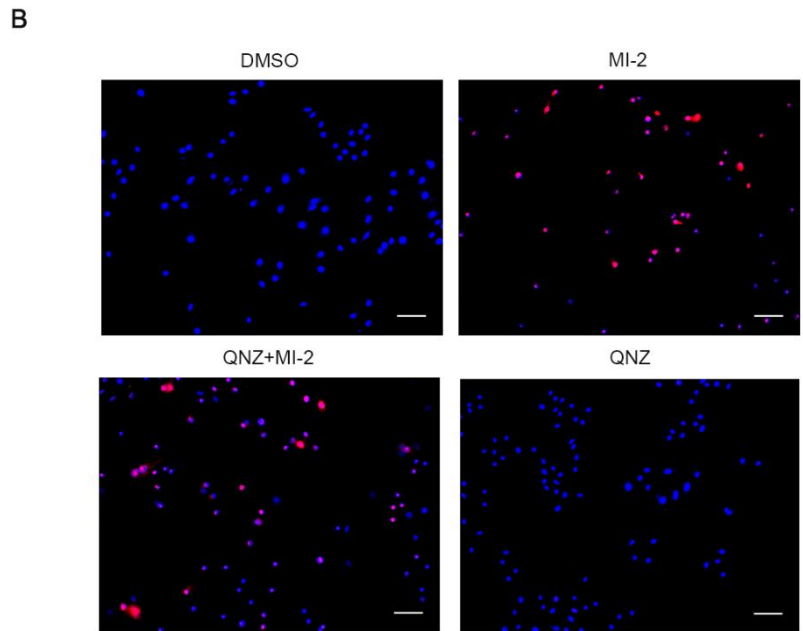

**Supplementary Fig. 4**

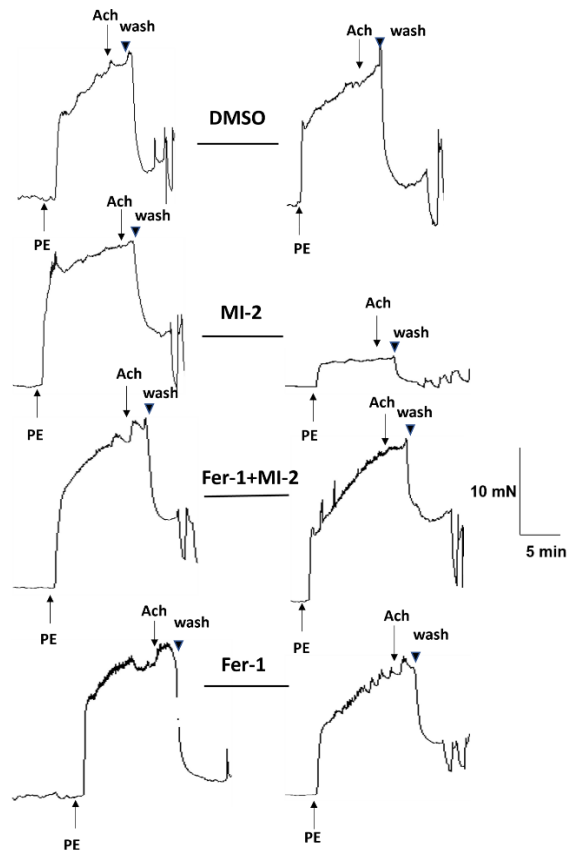

Supplementary Fig. 5

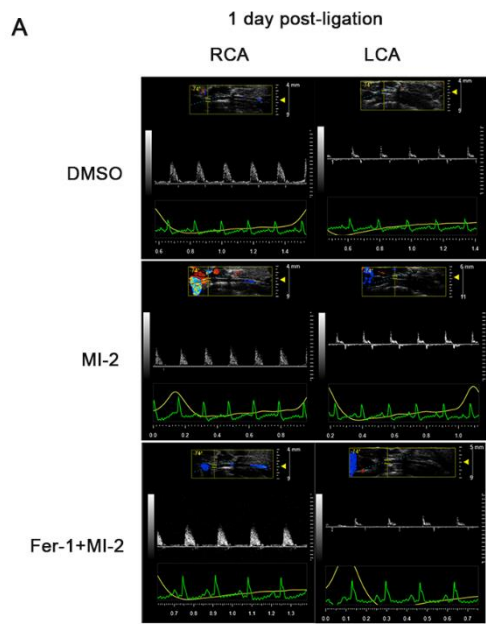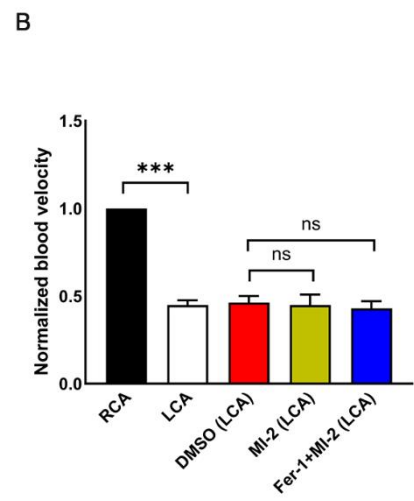

Supplementary Fig. 6
